# Supplementary material for: Gas circulation rate and medium exchange ratio as influential factors affecting ethanol production in carbon monoxide fermentation using a packed-bed reactor
Source: Royal Society of Chemistry journal article supplement (doi:10.1039/c9se00943d), 2020-01-01
Supplement: c9se00943d1.pdf [file c9se00943d1.pdf]

## Supplementary information

The following is included as additional **Supplementary information** for this paper

### Figure Legends

**Fig. S1.** Variation of CO-water  $k_La$  in a 1x composition medium. The experimental setup is the same as the biotic test condition and only gas flowrate was controlled. All data point was obtained in triplicate.

**Fig. S2.** Change in the ethanol productivity against mean dilution rate and gas circulation rate. The experimental conditions to obtain the maximized ethanol productivity were determined by the linear fitting line.

**Fig. S3.** Extrapolation of the volumetric ethanol productivity versus the experimental internal gas circulation rate. Eqn. 9 was used to fit the data. a and b were estimated to be 3.78 and 0.49, respectively.

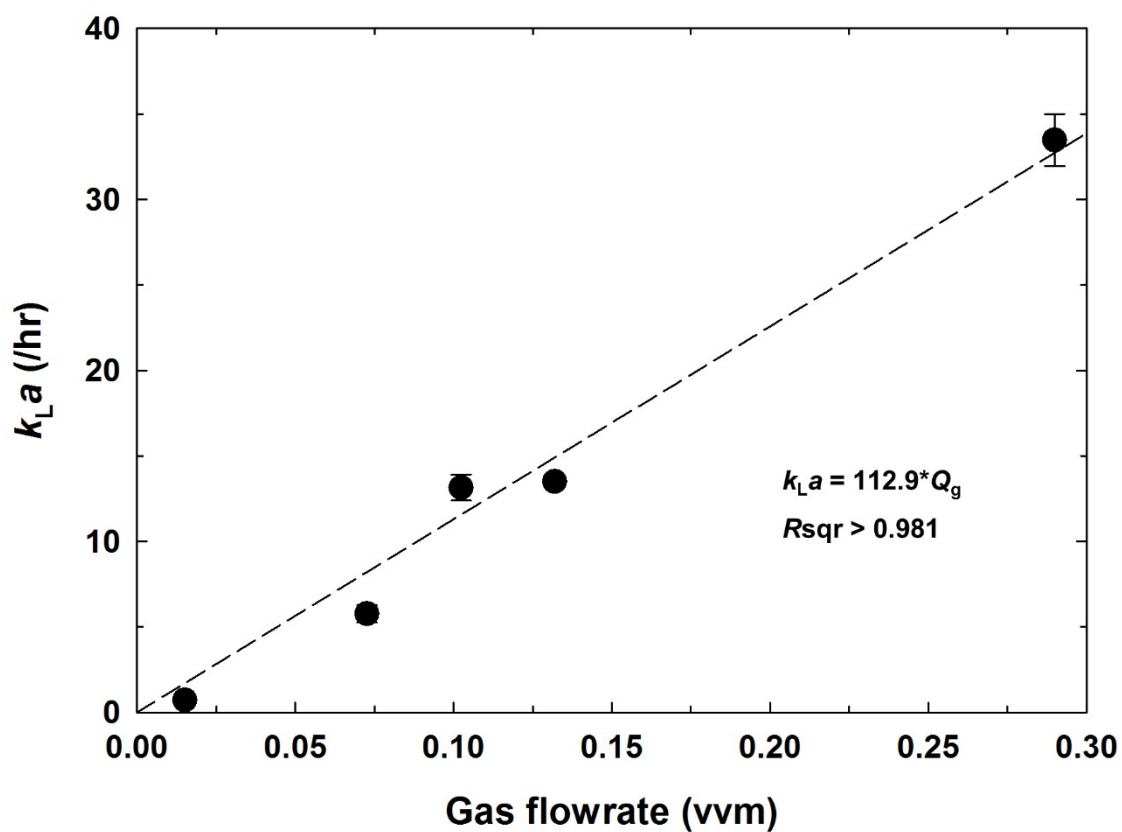

**Figure S1.** Variation of CO-water  $k_L a$  in a 1x composition medium. The experimental setup is the same as the biotic test condition and only gas flowrate was controlled. All data point was obtained in triplicate.

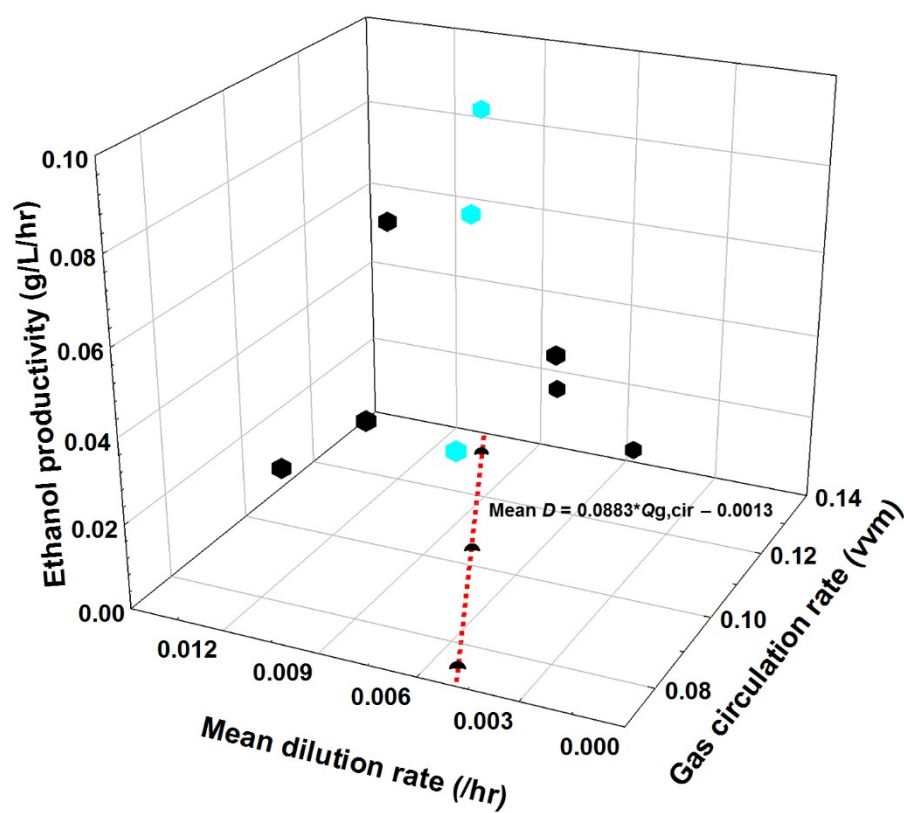

**Figure S2.** Change in the ethanol productivity against mean dilution rate and gas circulation rate. The experimental conditions to obtain the maximized ethanol productivity were determined by the linear fitting line.

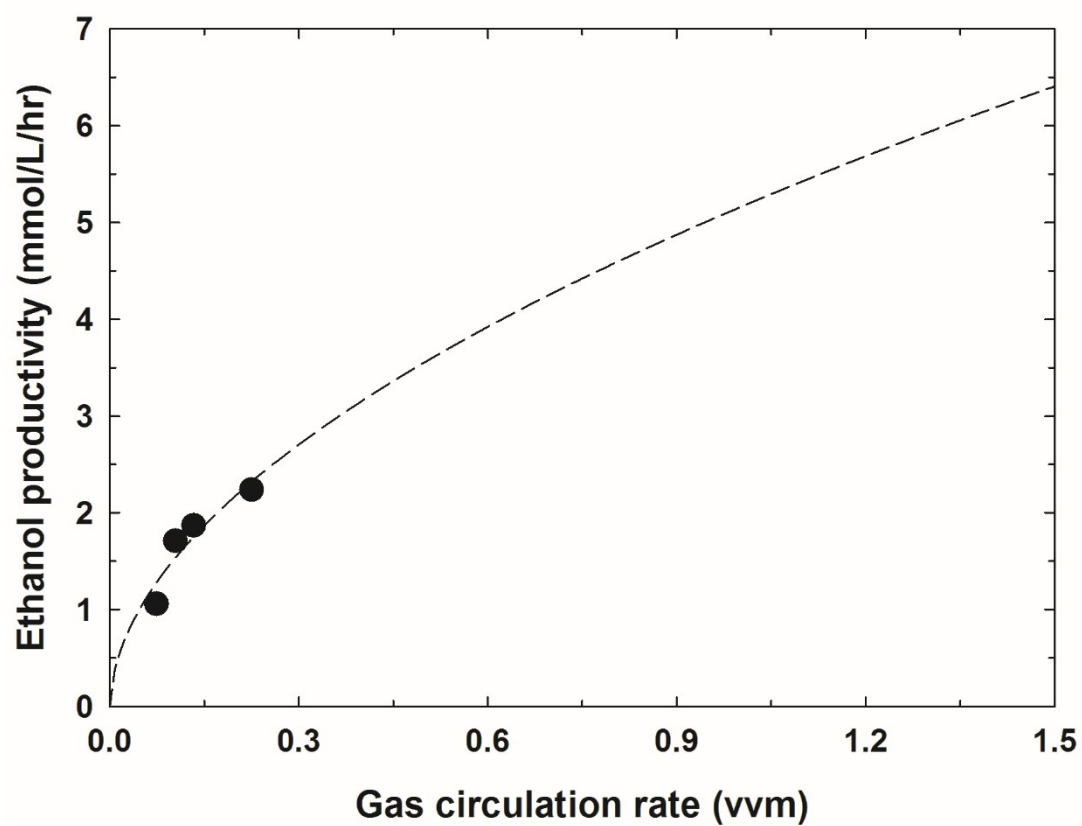

**Figure S3.** Extrapolation of the volumetric ethanol productivity versus the experimental internal gas circulation rate. Eqn. (4) was used to fit the data.  $a$  and  $b$  were estimated to be 3.78 and 0.49, respectively.

### Table Legends

**Table. S1.** Price of chemical compounds according to medium composition. Prices of chemicals were mainly taken from the prices of the bulk products of Duksan chemicals (Korea), Samchun chemicals (Korea), Daejungchem (Korea), KANTO chemicals (Japan), Wako chemicals (Japan) and Sigma-Aldrich.

**Table S1. Price of chemical compounds according to medium composition. Prices of chemicals were mainly taken from the prices of the bulk products of Duksan chemicals (Korea), Samchun chemicals (Korea), Daejungchem (Korea), KANTO chemicals (Japan), Wako chemicals (Japan) and Sigma-Aldrich.**

| Chemicals                                                                             | Price (\$/L)     |                  |                  |
|---------------------------------------------------------------------------------------|------------------|------------------|------------------|
|                                                                                       | 1x               | 10x              | 20x              |
| <b>General</b>                                                                        |                  |                  |                  |
| Yeast extract                                                                         | 0.0120000        | 0.0120000        | 0.0120000        |
| NaCl*                                                                                 | 0.0015748        | 0.0157480        | 0.0314961        |
| MgSO <sub>4</sub> *                                                                   | 0.0004147        | 0.0041471        | 0.0082942        |
| CaCl <sub>2</sub> *                                                                   | 0.0010105        | 0.0101050        | 0.0202100        |
| NH <sub>4</sub> Cl*                                                                   | 0.0041032        | 0.0410324        | 0.0820647        |
| K <sub>2</sub> HPO <sub>4</sub>                                                       | 0.0091433        | 0.0091433        | 0.0091433        |
| Resazurin                                                                             | 0.0000098        | 0.0000098        | 0.0000098        |
| L-Cysteine-HCl                                                                        | 0.1058618        | 0.1058618        | 0.1058618        |
| <b>Trace minerals</b>                                                                 |                  |                  |                  |
| Nitrilotriacetic acid*                                                                | 0.0018750        | 0.0187500        | 0.0375000        |
| FeSO <sub>4</sub> ·7H <sub>2</sub> O*                                                 | 0.0000026        | 0.0000262        | 0.0000525        |
| MnCl <sub>2</sub> ·4H <sub>2</sub> O*                                                 | 0.0000066        | 0.0000656        | 0.0001312        |
| CoCl <sub>2</sub> ·6H <sub>2</sub> O*                                                 | 0.0001339        | 0.0013386        | 0.0026772        |
| ZnCl <sub>2</sub> *                                                                   | 0.0000066        | 0.0000656        | 0.0001312        |
| CaCl <sub>2</sub> ·6H <sub>2</sub> O*                                                 | 0.0000355        | 0.0003552        | 0.0007104        |
| CuCl <sub>2</sub> ·2H <sub>2</sub> O*                                                 | 0.0000057        | 0.0000570        | 0.0001141        |
| H <sub>3</sub> BO <sub>3</sub> *                                                      | 0.0000003        | 0.0000031        | 0.0000061        |
| Na <sub>2</sub> MoO <sub>4</sub> *                                                    | 0.0000606        | 0.0006060        | 0.0012120        |
| Na <sub>2</sub> SeO <sub>4</sub> *                                                    | 0.0000231        | 0.0002310        | 0.0004619        |
| NiSO <sub>4</sub> ·6H <sub>2</sub> O*                                                 | 0.0000028        | 0.0000279        | 0.0000558        |
| NaCl*                                                                                 | 0.0000175        | 0.0001750        | 0.0003500        |
| MnSO <sub>4</sub> ·H <sub>2</sub> O*                                                  | 0.0000962        | 0.0009624        | 0.0019248        |
| Fe(NH <sub>4</sub> ) <sub>2</sub> (SO <sub>4</sub> ) <sub>2</sub> ·6H <sub>2</sub> O* | 0.0001141        | 0.0011409        | 0.0022817        |
| ZnSO <sub>4</sub> ·7H <sub>2</sub> O*                                                 | 0.0000086        | 0.0000857        | 0.0001715        |
| NiCl <sub>2</sub> ·6H <sub>2</sub> O*                                                 | 0.0000057        | 0.0000570        | 0.0001141        |
| Na <sub>2</sub> WO <sub>4</sub> *                                                     | 0.0003180        | 0.0031800        | 0.0063600        |
| <b>Vitamin solution</b>                                                               |                  |                  |                  |
| Biotin                                                                                | 0.0003264        | 0.0003264        | 0.0003264        |
| Folic acid                                                                            | 0.0000173        | 0.0000173        | 0.0000173        |
| Pyridoxine HCl                                                                        | 0.0000008        | 0.0000008        | 0.0000008        |
| Thiamine HCl                                                                          | 0.0000768        | 0.0000768        | 0.0000768        |
| Riboflavin                                                                            | 0.0000060        | 0.0000060        | 0.0000060        |
| Nicotinic acid                                                                        | 0.0000013        | 0.0000013        | 0.0000013        |
| Pantothenic acid                                                                      | 0.0005432        | 0.0005432        | 0.0005432        |
| Cyanocobalamin                                                                        | 0.0004411        | 0.0004411        | 0.0004411        |
| p-aminobenzoic acid                                                                   | 0.0000012        | 0.0000012        | 0.0000012        |
| Lipoic acid                                                                           | 0.0002165        | 0.0002165        | 0.0002165        |
| <b>Total cost (\$)</b>                                                                | <b>0.1384615</b> | <b>0.2268053</b> | <b>0.3249650</b> |

\* Concentration reinforced
